# Supplementary material
Source: PubMed Central journal article supplement (PMC139258)

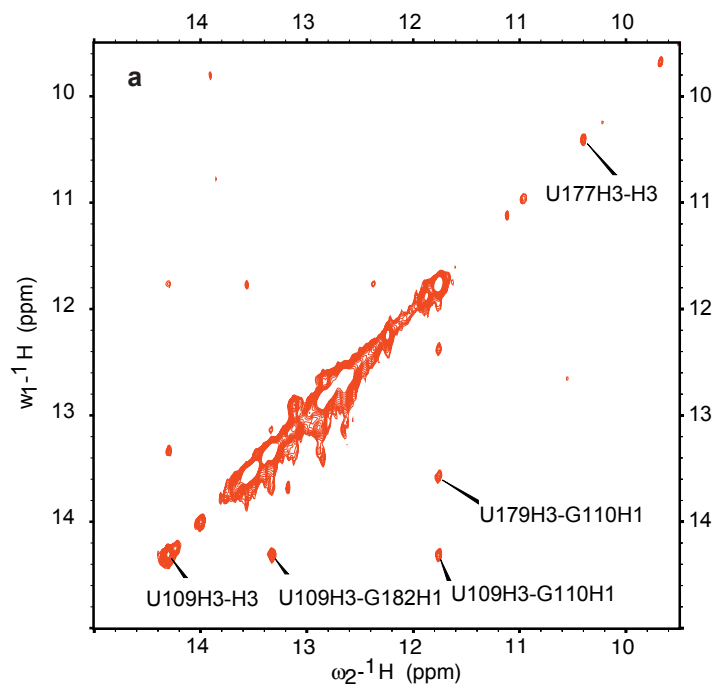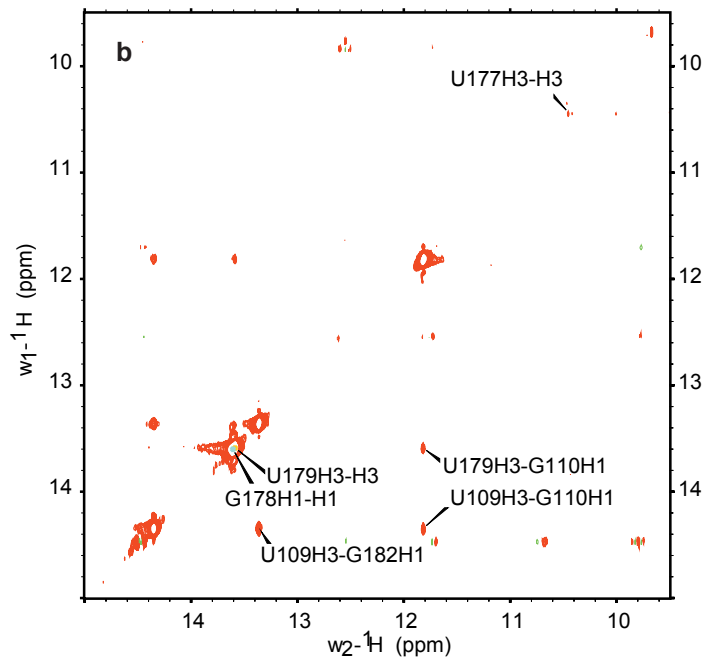

Supplement: pnas_99_26_16998__10.pdf [file pnas_99_26_16998__10.pdf]

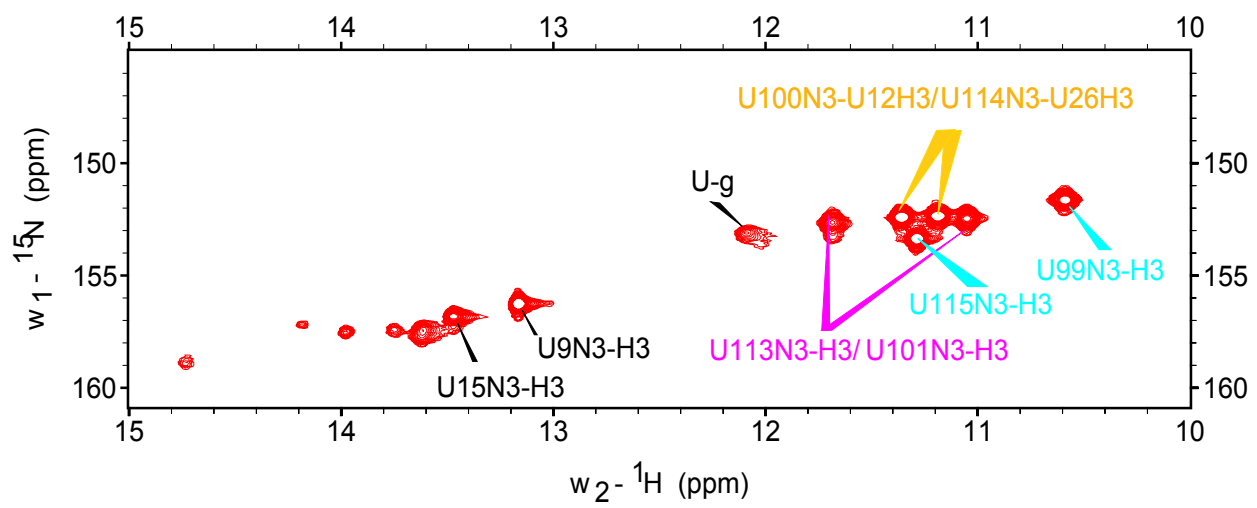

Supplement: pnas_99_26_16998__12.pdf [file pnas_99_26_16998__12.pdf]

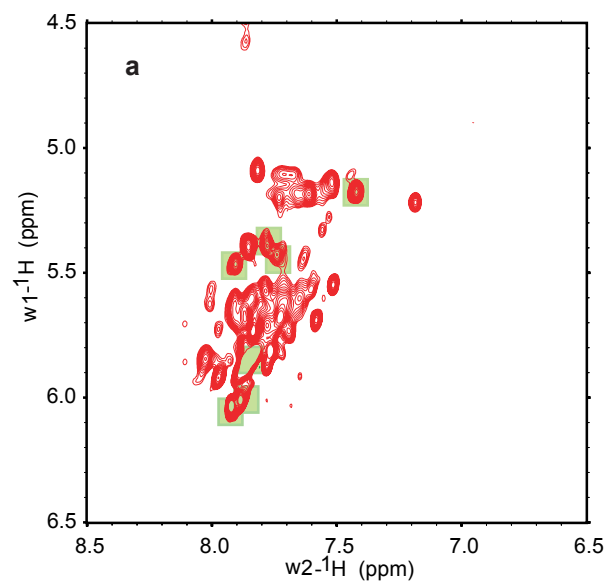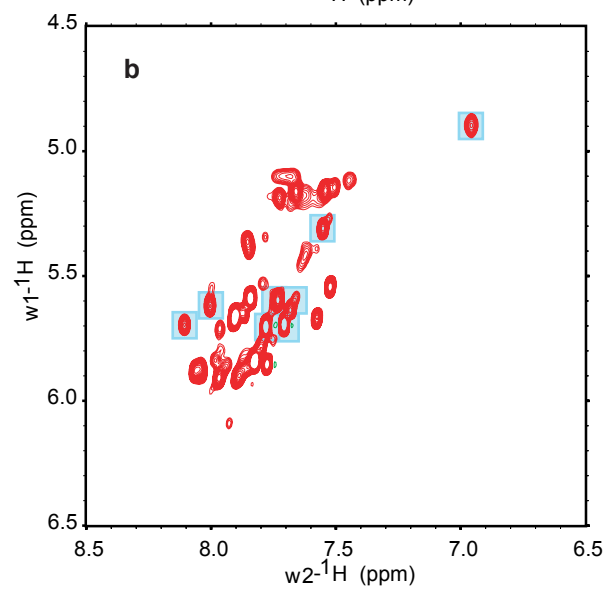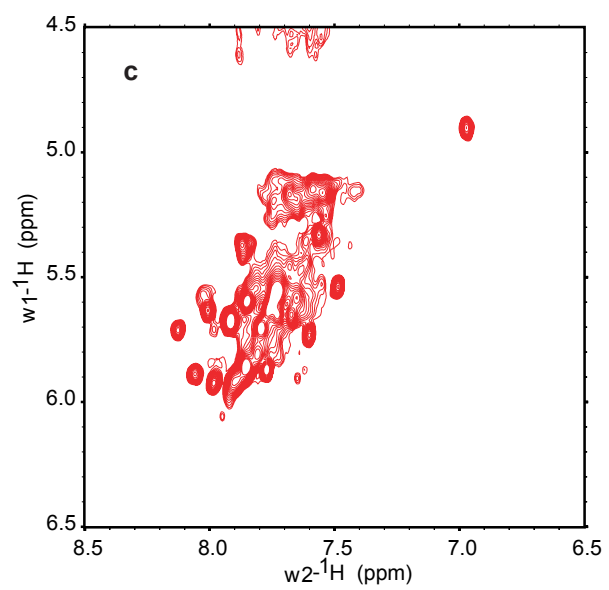

Supplement: pnas_99_26_16998__14.pdf [file pnas_99_26_16998__14.pdf]

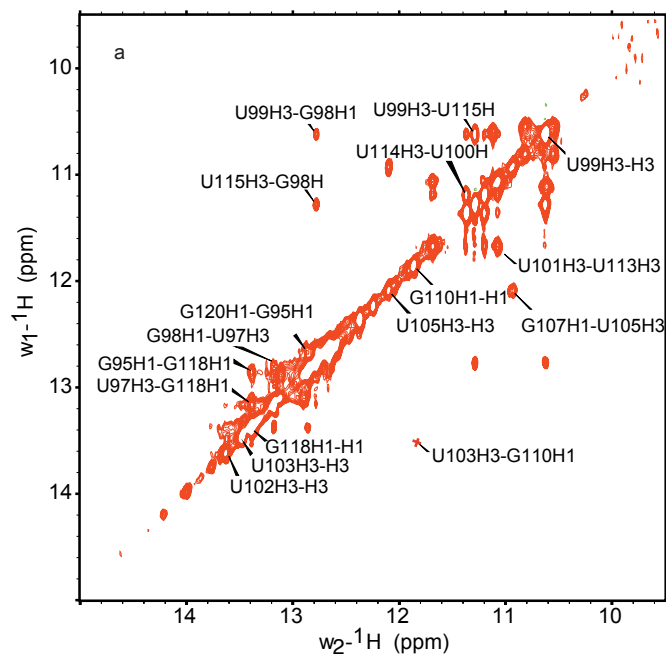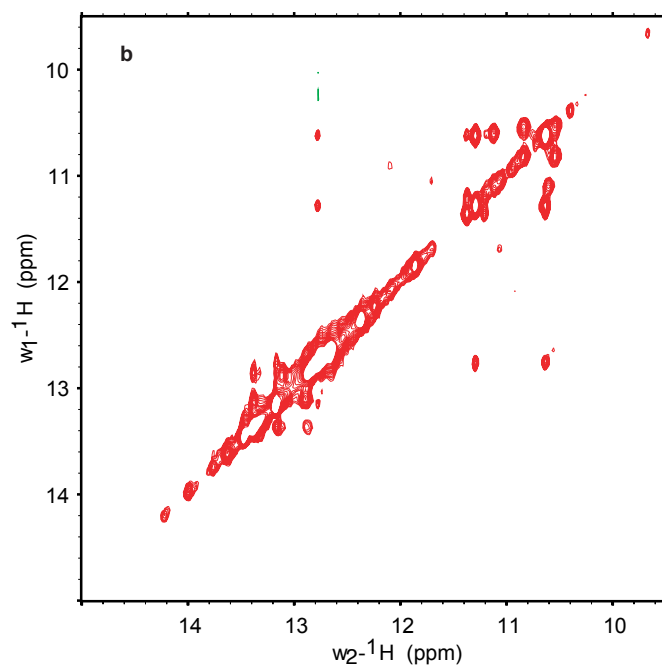

Supplement: pnas_99_26_16998__16.pdf [file pnas_99_26_16998__16.pdf]

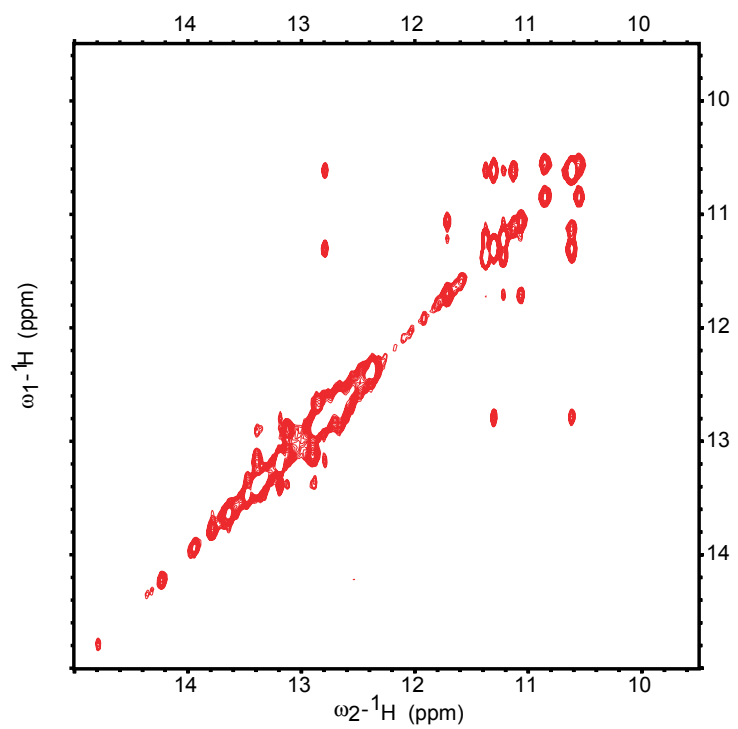

Supplement: pnas_99_26_16998__18.pdf [file pnas_99_26_16998__18.pdf]

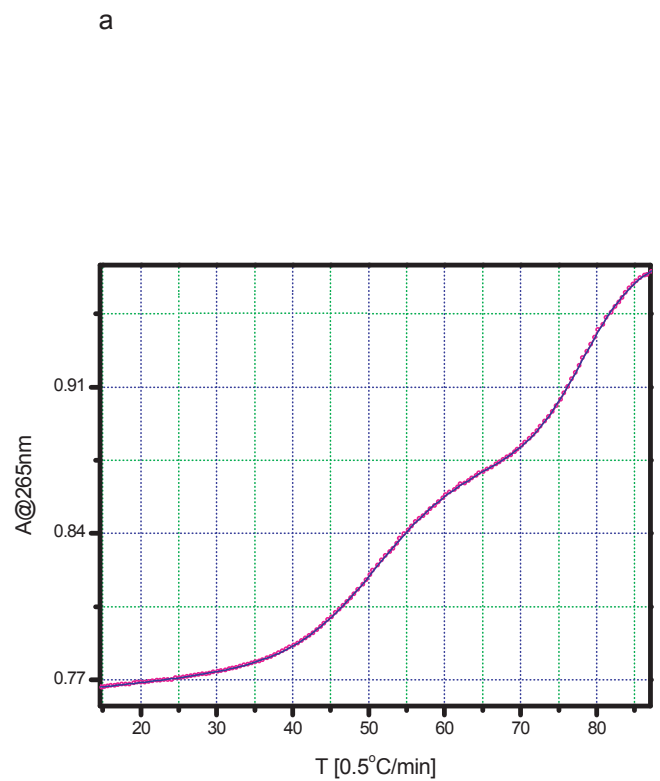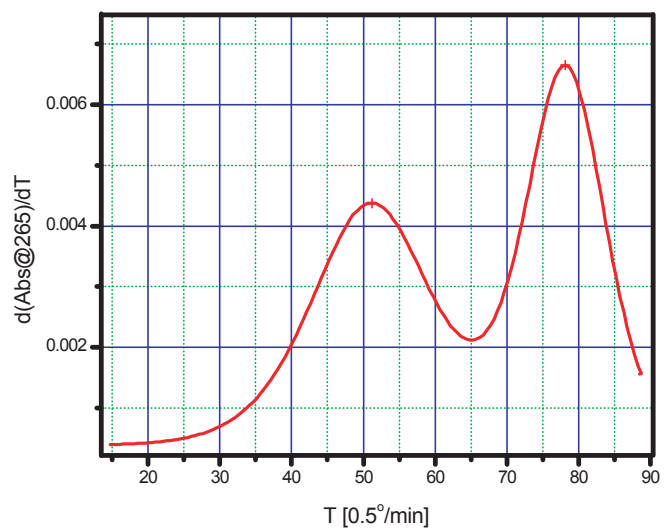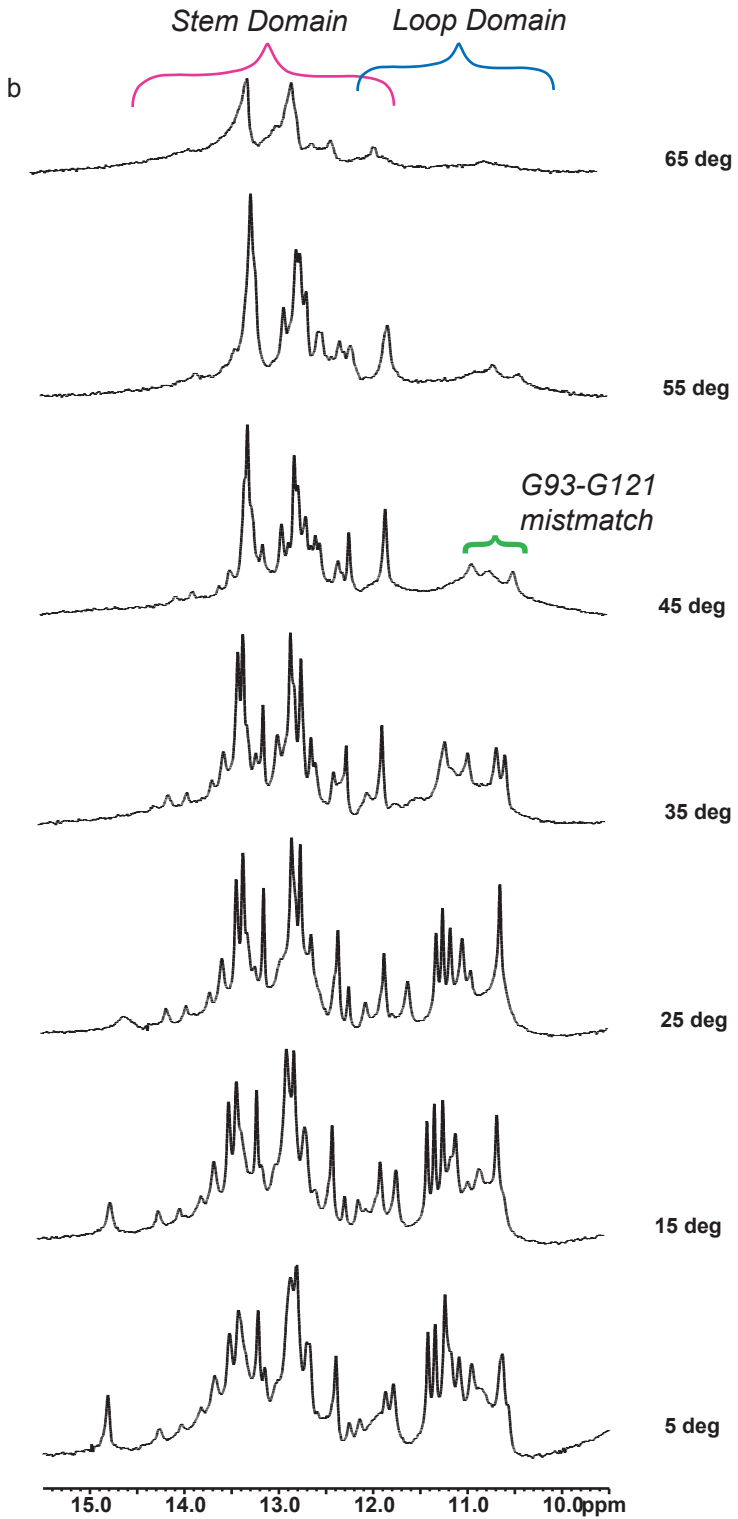

Supplement: pnas_99_26_16998__2.pdf [file pnas_99_26_16998__2.pdf]

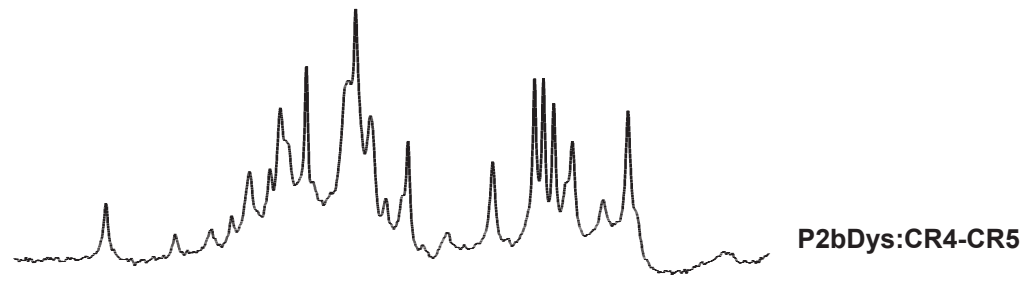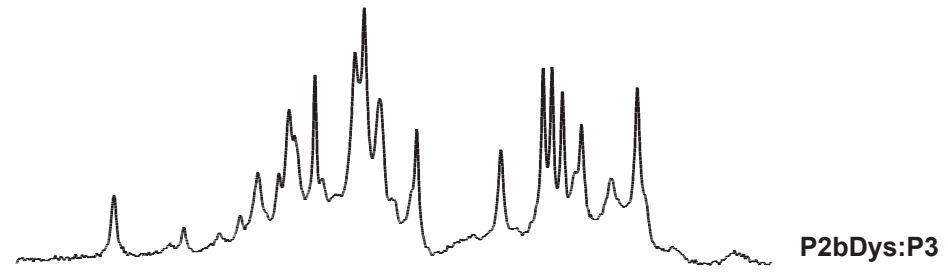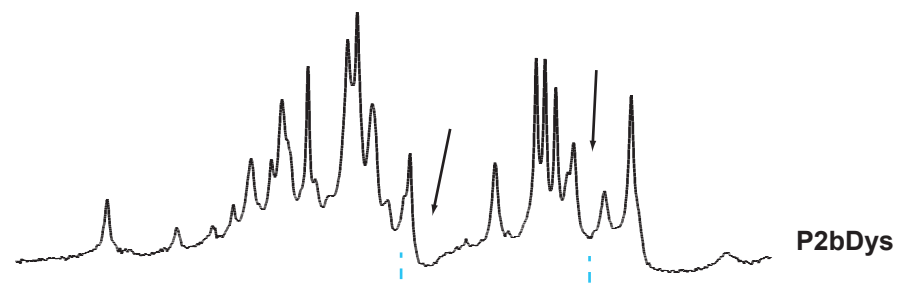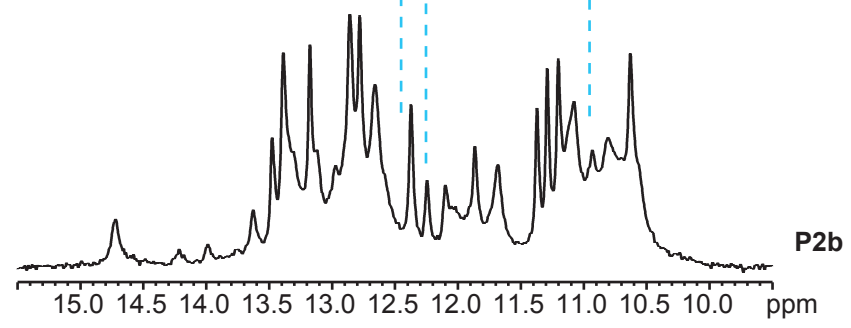

Supplement: pnas_99_26_16998__20.pdf [file pnas_99_26_16998__20.pdf]

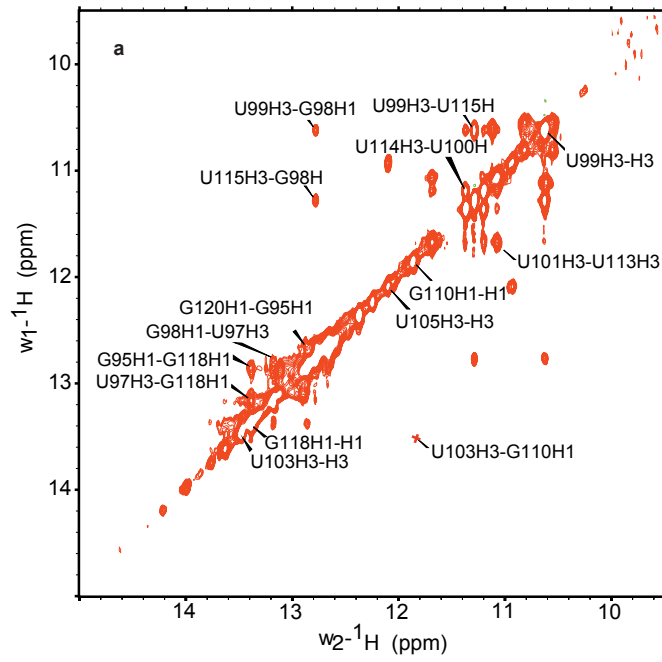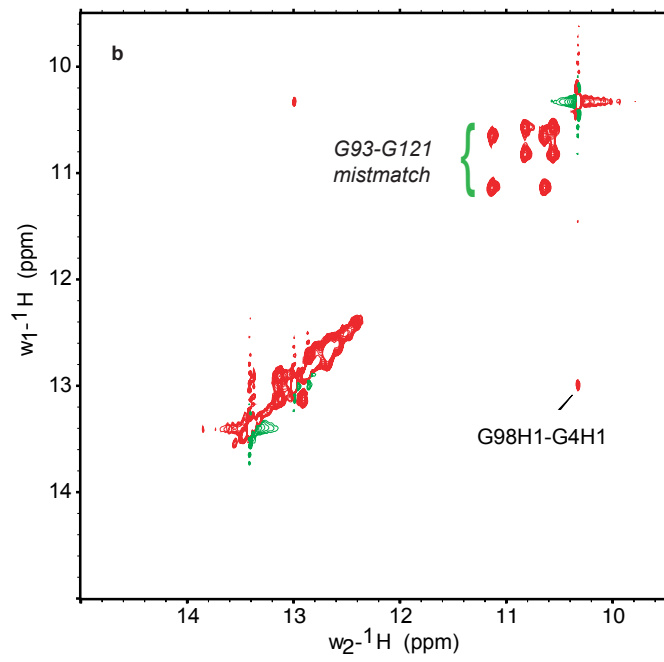

Supplement: pnas_99_26_16998__4.pdf [file pnas_99_26_16998__4.pdf]

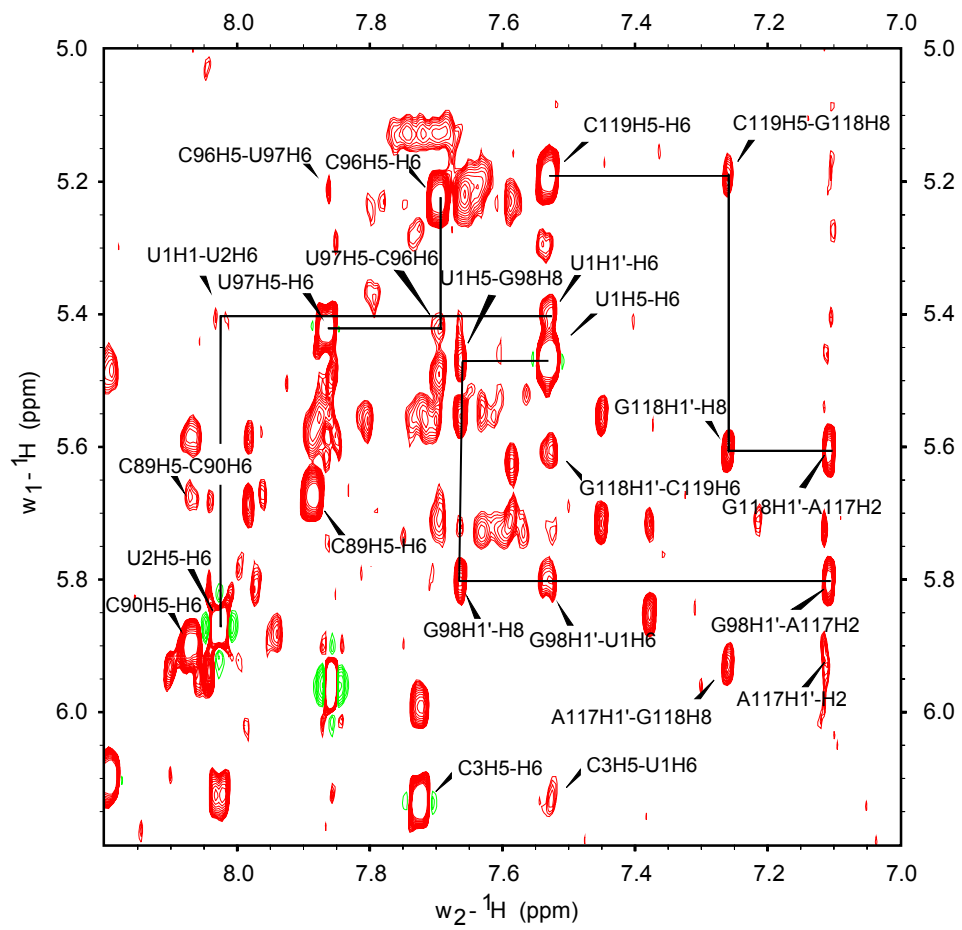

Supplement: pnas_99_26_16998__6.pdf [file pnas_99_26_16998__6.pdf]

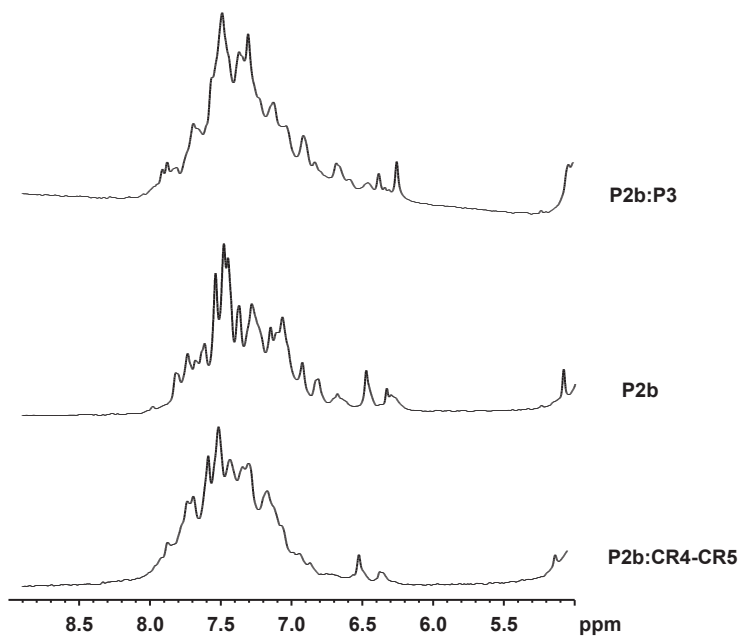

Supplement: pnas_99_26_16998__8.pdf [file pnas_99_26_16998__8.pdf]
